# Supplementary material
Source: publisher site journal article supplement (https://www.dovepress.com/article/530791)
Supplement: Supplementary file 1 [file 530791%20Supplementary%20Material.docx]

**Supplementary Figure 1. CLDN3 immunostaining and patient prognosis in different pT stage groups in all cancers**

**Supplementary Figure 2. CLDN3 and PD-L1 immunostaining**

**Supplementary Table 1.**

|  | | **95% confidence interval** | | | |
| --- | --- | --- | --- | --- | --- |
| **hazard ratio** | **below** | **above** | **p-value** |
| All cancers | tumor stage |  |  |  |  |
| pT2 vs pT1 | 0.6389 | 0.188971 | 2.15991 | 0.2597 |
| pT3 vs pT2 | 3.3733 | 1.016389 | 11.19573 |  |
| pT4 vs pT3 | 0.3323 | 0.098745 | 1.118546 |  |
| lymph node status |  |  |  |  |
| pN+ vs pN0 | 3.0030 | 1.192531 | 7.562239 | 0.0288 |
| Grade |  |  |  |  |
| Grade 3 vs Grade 1-2 | 1.5331 | 0.543463 | 4.325043 | 0.3184 |
| resection margin status |  |  |  |  |
| R+ versus R0 | 2.1621 | 0.278098 | 16.80918 | 0.5368 |
| CLDN3 immunostaining |  |  |  |  |
| weak vs negative | 2.1748 | 0.537875 | 8.793046 | 0.4491 |
| moderate vs weak | 0.6051 | 0.153884 | 2.379288 |  |
| strong vs moderate | 0.5700 | 0.188328 | 1.725352 |  |
|  |  |  |  |  |  |
| Adenocarcinomas | tumor stage |  |  |  |  |
| pT2 versus pT1 | 0.1108 | 0.011656 | 1.052532 | 0.0325 |
| pT3 versus pT2 | 14.8733 | 1.602848 | 138.013 |  |
| pT4 versus pT3 | 0.3565 | 0.063417 | 2.003891 |  |
| lymph node status |  |  |  |  |
| pN+ versus pN0 | 2.6956 | 0.641412 | 11.32859 | 0.1624 |
| Grade |  |  |  |  |
| Grade 3 versus Grade 1-2 | 1.4511 | 0.243859 | 8.635263 | 0.6778 |
| resection margin status |  |  |  |  |
| R+ versus R0 | 1.9311 | 0.227001 | 16.42753 | 0.5765 |
| CLDN3 immunostaining |  |  |  |  |
| strong versus moderate | 0.4728 | 0.138002 | 1.619867 | 0.4648 |
| moderate versus weak | 0.7902 | 0 | . |  |
|  |  |  |  |  |  |
| Squamous cell carcinomas | tumor stage |  |  |  |  |
| pT2 versus pT1 | 3.1277 | 0.249815 | 39.15887 | 0.7309 |
| pT3 versus pT2 | 0.5405 | 0.03198 | 9.136477 |  |
| pT4 versus pT3 | 0.5565 | 0.040584 | 7.631548 |  |
| lymph node status |  |  |  |  |
| pN+ versus pN0 | 3.8137 | 0.46744 | 31.11424 | 0.2017 |
| Grade |  |  |  |  |
| Grade 3 versus Grade 1-2 | 0.9763 | 0.14738 | 6.467684 | 0.9802 |
| resection margin status |  |  |  |  |
| R+ versus R0 | 0.0000 | 0 | . | 0.7645 |
| CLDN3 immunostaining |  |  |  |  |
| weak | 2.5917 | 0.341376 | 19.6753 | 0.3148 |
| moderate | 0.0000 | 0 | . |  |
| strong | 0.7020 | 0 | . |  |
